# Supplementary material for: Cognition, fear, and falls: psychological predictors of balance impairment in community-dwelling older adults
Source: Front Psychiatry. 2025 Jun 3;16:1610894. doi: 10.3389/fpsyt.2025.1610894 (PMC12170642; doi:10.3389/fpsyt.2025.1610894)
Supplement: Supplementary file 1 [file Table1.xlsx]

## Sheet: Sheet1
Age (years)	Gender	BMI (kg/m²)	Cognitive Function Score (slums)	Fear of Falling Score (FES-I)	Balance Performance (BBS)	History of Falls	Physical Activity Level (METs)	Medications	Chronic Conditions
75.68	Male	26.57	24.88	27.05	34.62	Yes	2836.1	4.06	2.45
71.67	Male	28.23	28.12	26.99	56.46	No	2132.59	3.72	2.48
76.63	Male	21.81	24.85	29.6	46	No	2630.81	3.01	2.03
82.17	Male	21.54	27.04	22.78	55.63	Yes	2456.03	2.21	2.3
71.06	Female	27.4	26.65	26.29	35.47	No	3410.84	5.26	2.62
71.06	Female	26.68	25.03	21.02	42.55	No	2751.89	4.34	0.86
82.52	Female	26.54	31.51	24.39	46.86	Yes	2811.9	2.66	1.18
77.39	Female	26.84	28.01	21.98	47.15	No	2271.19	2.66	3
69.57	Female	23.58	21.84	23.19	43.62	Yes	2216.56	3.84	2.5
75.97	Male	26.48	26.97	25.83	51.25	No	2256.27	6.3	2.19
69.61	Female	26.67	25	18.33	39.22	Yes	2852.92	3.93	2.37
69.6	Female	23.47	28.52	33.78	45.81	No	2264.62	2.4	2.65
74.07	Female	31.67	24.7	17.33	47.68	No	2777.4	3.95	1.88
60.45	Female	27.25	26.27	16.22	50.48	No	4065.64	3.91	1.67
61.64	Male	21.95	27.71	28.82	51.89	No	3196.81	0.93	2.52
68.99	Male	27.83	28.55	26.87	38.81	No	2333.13	4.18	1.5
66.14	Male	22.64	23.76	25.98	35.9	Yes	3434.96	3.97	2.71
74.53	Male	28.24	25.76	26.01	55.92	No	2273.93	5.11	0.87
66.8	Female	29.42	25.44	22.6	49.19	No	1097.94	6.52	3.25
63.61	Female	23.13	25.02	17.91	41.49	No	1841.06	5.64	2.76
81.8	Male	28.8	30.64	23.07	57.86	No	1218.66	3.92	2.57
71.11	Female	27.05	27.48	19.07	47.64	Yes	2314.74	2.89	3.2
72.97	Male	28.35	23.61	27.85	55.22	No	2581.63	7.42	3.8
63.54	Male	31.77	28.67	21.89	47.3	No	3777.81	4.32	3.23
69.1	Male	24.96	31.46	18.29	61.49	No	2804.2	4.27	0.75
73.24	Male	23.34	28.94	20.96	59.32	No	2410.27	4.22	1.24
65.27	Female	22.91	23.02	24.86	45.05	No	3166.71	4.49	1.81
74.91	Male	23.15	25.42	19.68	53.74	No	973.12	4.07	2.37
68.74	Female	25.49	29.48	18.3	51.42	No	2738.32	3.54	2.8
70.7	Female	26.82	24.9	23.96	56.56	Yes	3124.48	3.58	1.72
68.74	Male	26.62	27.57	23.97	39.95	Yes	1501.61	4.21	2.51
84.25	Female	28.37	28.34	19.98	51.7	Yes	3393.5	3.58	1.69
72.45	Female	25.78	24.39	20.17	54.36	Yes	2812.55	3.37	1.82
65.86	Male	30.36	26.4	23.9	34.3	Yes	2268.73	4.38	1.13
77.74	Female	24.9	19.02	14.98	38.4	Yes	3024.86	3.94	1.55
64.82	Male	34.39	24.16	15.2	32.3	No	4206.53	6.1	1.17
73.86	Male	27.73	25.95	18.86	44.9	Yes	2699.55	0.99	1.5
60.15	Male	23.01	23.65	21.54	51.93	No	2747.42	5.59	3.27
64.15	Female	22.33	30.33	24.32	57.52	Yes	2236.93	5.78	1.52
73.78	Female	27.27	23.22	30.5	47.35	No	1955.22	1.7	4.64
77.21	Male	25.03	25.52	27.22	58.42	No	3167.39	3.83	2.78
73.62	Male	28.01	26.84	21.82	36.99	No	1950.72	3.79	2.51
71.81	Female	27.24	29.88	22.57	34.69	Yes	2619.97	2.52	1.6
70.64	Male	25.51	23.21	17.35	46.42	No	2223.73	3.29	2.96
63.2	Male	23.05	29.24	22.57	49.55	No	2913.9	2.88	1.85
67.99	Female	20.92	26.56	21.14	46.59	No	2809.06	6.41	2.46
69.63	Female	24.32	24.26	24.38	32.1	No	3316.87	5.4	4.58
79.22	Male	28.46	27.61	18.28	46.19	Yes	2200.39	5.81	2.27
74.71	Female	26.42	27	25.43	37.53	Yes	2373.64	5.14	3.35
61.4	Female	21.78	25.15	30.81	51.59	No	1862.21	2.86	1.74
74.59	Male	26.29	26.7	22.09	49.43	No	2247.8	3.6	2.32
70.11	Female	26.97	25.65	24.8	40.13	No	2840.54	4.85	3.89
68.26	Male	22.93	26.8	26.33	43.16	No	3114.47	2.75	1.8
76.41	Female	26.23	28.08	20.54	39.28	No	1903.04	5.13	3.93
79.06	Female	25.93	30.22	23.86	46.37	No	3195.72	3.95	2.97
78.43	Female	22.11	23.67	22.74	53.62	Yes	3546.36	3.79	1.86
67.24	Male	26.88	31.49	23.19	39.8	No	2866.61	5.12	2.9
70.59	Female	27.52	22.01	18.57	50.41	No	3922.35	4.8	3.2
74.63	Male	29.18	26.19	22.8	43.04	No	2010.09	3.81	2.89
78.71	Male	29.09	27.9	25.31	41.17	Yes	1670.38	5.68	0.98
69.51	Male	21.36	27.19	30.38	46.06	Yes	1285.08	2.92	1.72
71.37	Female	22.76	25.1	27.76	39.45	No	3647.66	5.01	2.13
65.55	Female	27.38	26.06	34.1	42.88	No	3040.43	4.98	2.29
64.98	Male	27.37	25.4	18.6	38.29	No	2528.24	3.87	2.89
77.68	Female	27.38	25.17	27.3	60.81	Yes	2770.32	4.65	2.5
81.11	Male	37.99	28.51	23.64	47.07	No	1756.36	2.71	1.19
72.08	Female	27.56	27.37	34.3	41.84	No	4332.83	5.39	2.68
78.88	Male	29.35	24.93	18.38	48.34	Yes	2661.57	4.02	2.88
74.83	Female	28.77	28.63	18.21	46.02	No	2647.26	3.61	2.84
68.46	Male	27.81	27.25	19.49	45.25	Yes	3091.94	5.54	3.29
74.82	Female	24.74	28.43	11.39	51.19	Yes	2915.36	3.38	3.08
82.26	Male	28.15	28	19.88	52.21	No	2729.86	2.52	2.75
72.31	Male	23.28	24.62	18.64	43.04	No	1998.05	2.34	2.29
82.43	Male	24.99	25.24	23.47	42.72	No	2908.48	5	0.9
55.98	Female	24.2	28.27	24.48	44.86	Yes	3926.13	2.68	2.72
77.73	Female	26	27.96	32.63	30.43	No	3538.99	6.41	2.53
73.09	Male	33.1	26.49	27.72	36.03	No	3717.74	1.69	2.59
70.65	Female	19.8	26.81	19.61	56.55	No	2199.52	6.34	1.24
73.12	Female	27.92	29.5	17.9	58.53	No	1854.39	4.51	1.41
59.98	Female	20.61	25.17	25.28	45.05	No	2477.59	4.13	3.27
71.15	Female	24.24	27.81	15.66	50.93	No	2608.54	3.58	2.32
74.8	Male	29.2	26.07	32.4	49.04	No	3357.74	4.74	2.94
81.88	Male	25.94	26.03	28.93	68.74	No	1347.31	4.2	2.37
69.26	Female	22.31	29.09	20.18	54.79	No	3671.83	5.61	2.38
